# Supplementary material for: Prostate stromal cell proteomics analysis discriminates normal from tumour reactive stromal phenotypes
Source: PubMed Central journal article supplement (PMC4991442; doi:10.18632/oncotarget.7716), 2016-02-25
Supplement: oncotarget-07-20124-s001.pdf [file oncotarget-07-20124-s001.pdf]

## SUPPLEMENTARY FIGURES AND TABLE

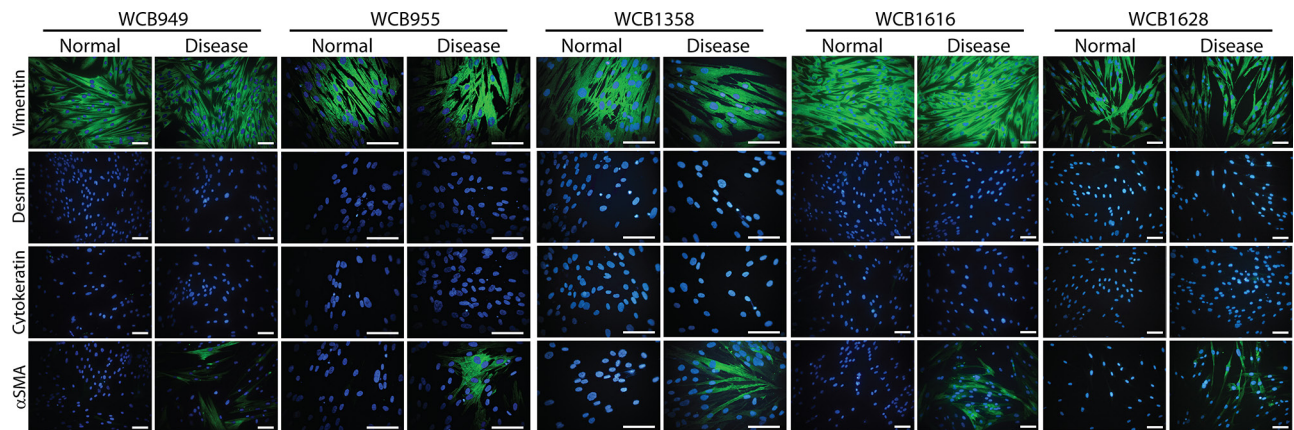

**Supplementary Figure S1: Comparing the phenotype of stromal pairs** Figure depicts immuno-fluorescent characterisation of primary stromal cells, isolated from normal or matched disease prostate tissue. Included are representative images for 5 patients, with the 6<sup>th</sup> shown as Figure 1B. Antibodies against Vimentin, Desmin, Cytokeratins 5 and 8 or  $\alpha$ SMA (green), and DAPI (blue) (Scale bar=100 $\mu$ m).

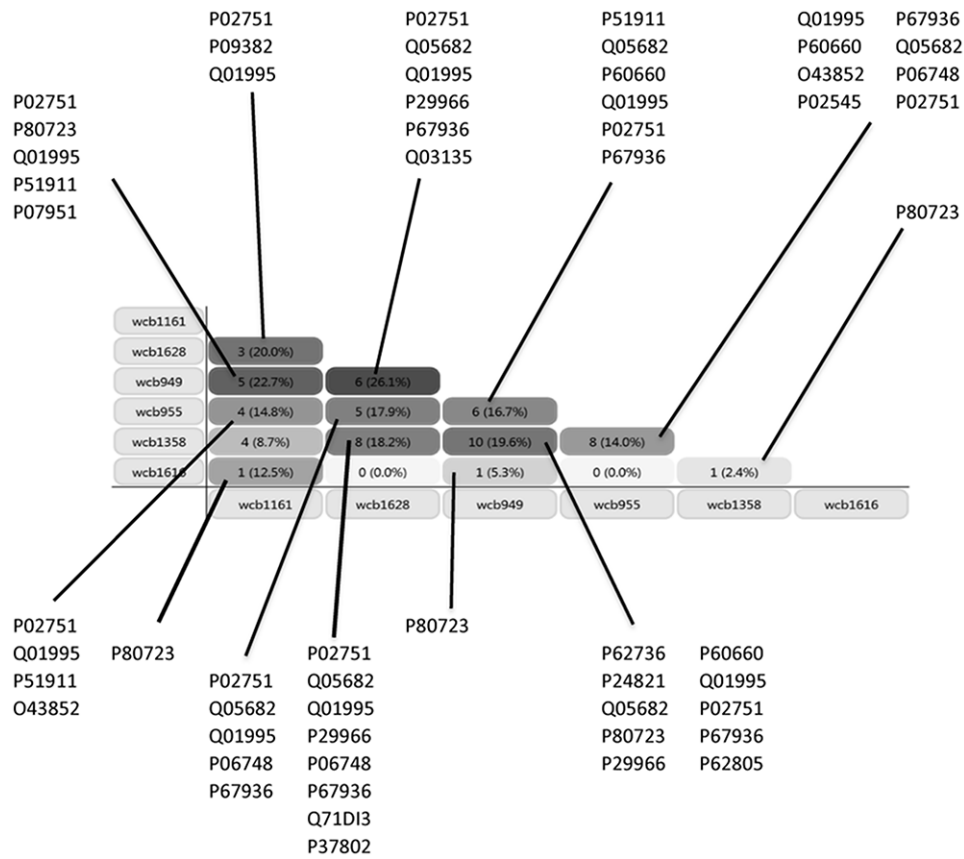

**Supplementary Figure S2: Comparing overlap in protein identifications across 6 patients** Differentially expressed proteins assigned to each individual patient were compared, using the Venn diagram tool of FunRich. The figure depicts the number of identifications and the proportion of overlap (%) across each of the 6 patients. Uniprot identifiers are given to specify proteins involved, and some of those identified in more than one patient were chosen for verification by other methods.

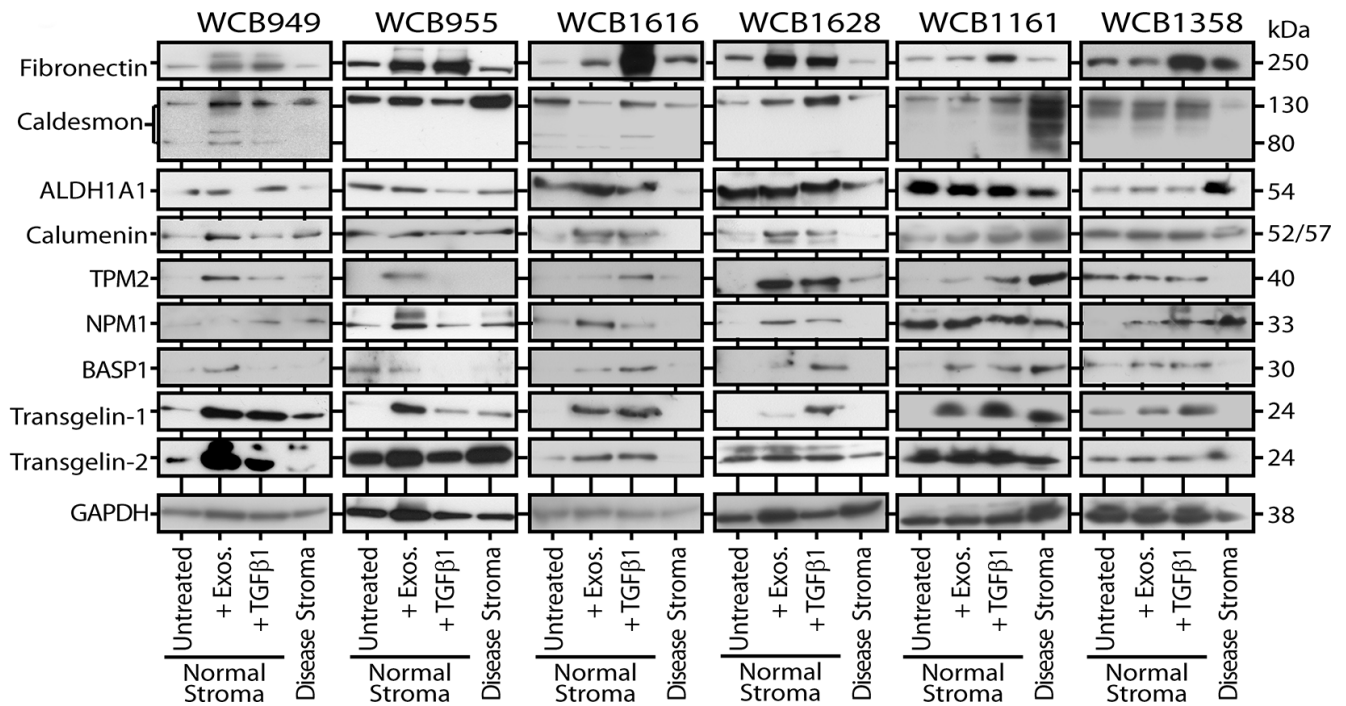

**Supplementary Figure S3: Validation of protein targets by western blots analysis.** Western blot analysis was used to validate changes in the expression of selected protein targets identified by proteomic analysis. Cell lysates prepared after 72 h stimulation were normalised for total protein, and 10µg loaded per track. The figure shows representative blots of 9 protein targets (plus GAPDH) for each of the 6 patients.

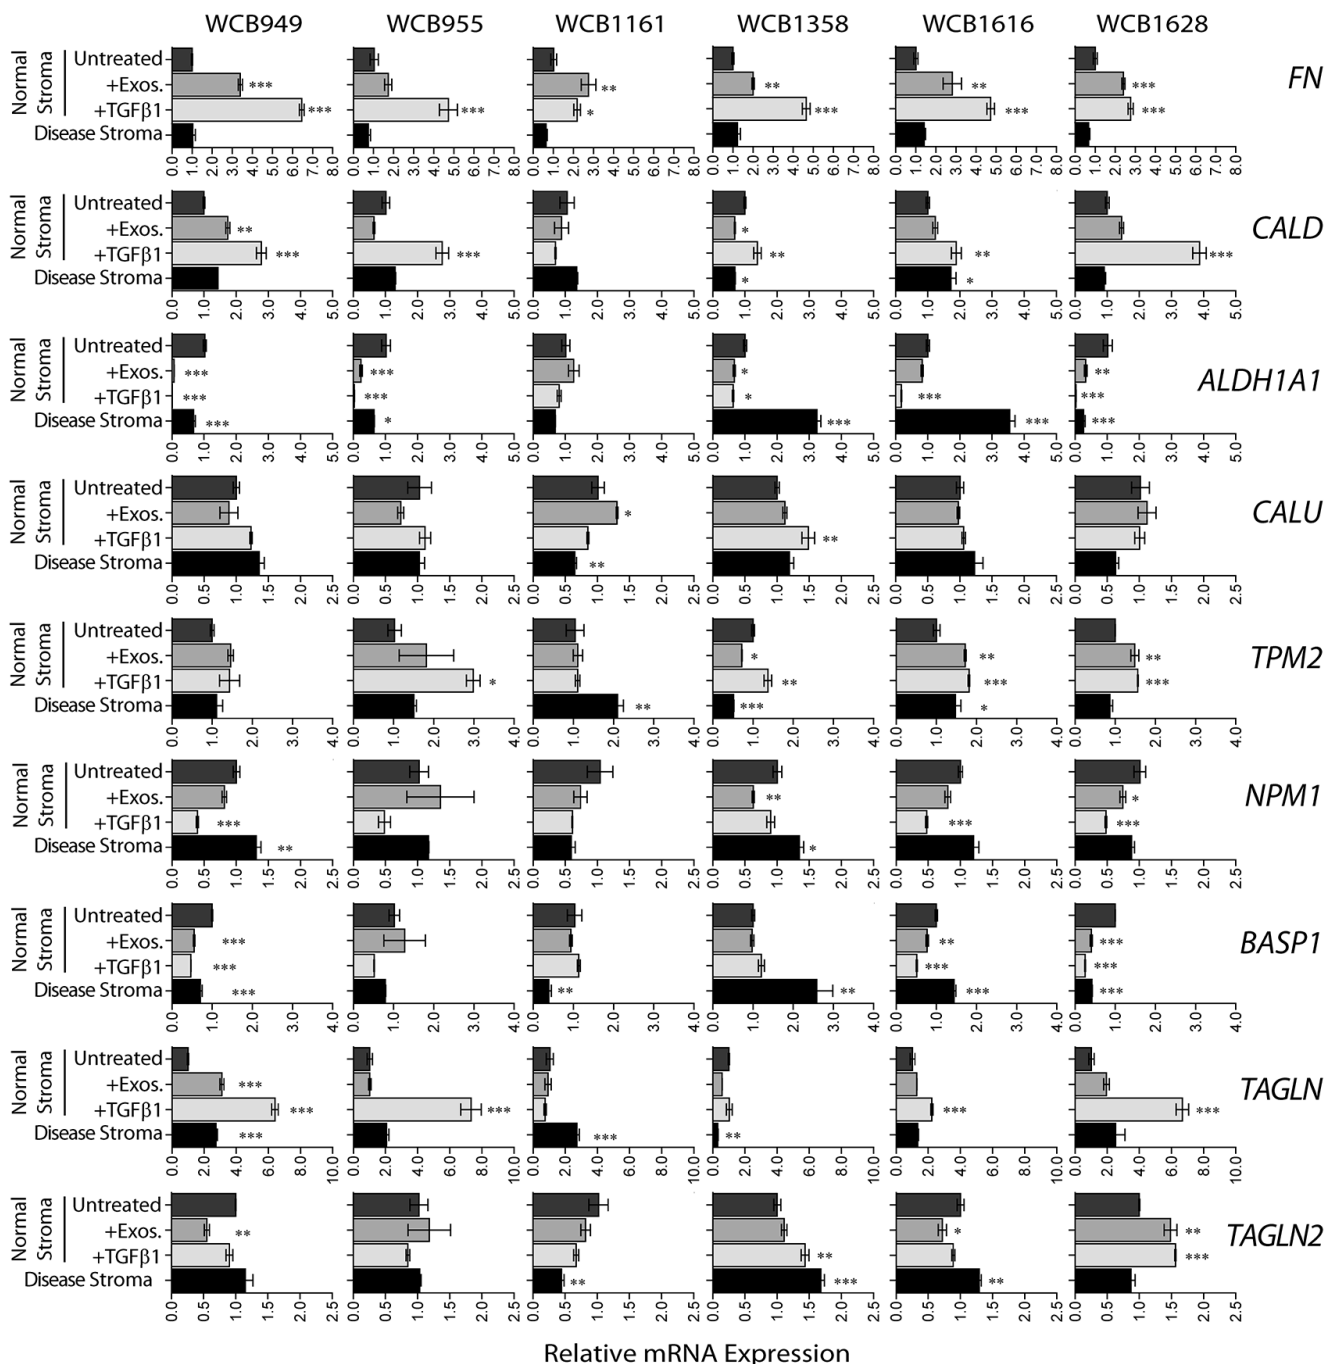

**Supplementary Figure S4: Validation of target expression at the transcript level by quantitative PCR.** Changes in protein transcript expression were analysed by quantitative PCR. Stromal cell mRNA was isolated at 72 h following treatment (as indicated) and relative transcript level compared to patient-matched untreated normal stromal cells is shown for each of the 6 patient sample sets (mean  $\pm$ SE of n=3 \* $p$ <0.05, \*\* $p$ <0.01, \*\*\* $p$ <0.001).

**Supplemental Table S1A: Normal Stroma vs Disease**

**Supplemental Table S1B: Normal Stroma vs Exosome Activated Normal Stroma**

**Supplemental Table S1C: Normal vs sTGFbeta activated Normal Stroma**

See Supplementary File 1
